# Supplementary material
Source: PubMed Central journal article supplement (PMC5079606)

SUPPLEMENTARY DATA

**Supplementary Figure 1.** Cumulative incidence of progression to macroalbuminuria in participants with normoalbuminuria (upper panel) and microalbuminuria (lower panel) at baseline by treatment group. Dashed line = placebo, solid line = losartan. Log-rank tests for the macroalbuminuria outcome yielded  $P=0.33$  in the normoalbuminuria group and  $P=0.17$  in the microalbuminuria group.

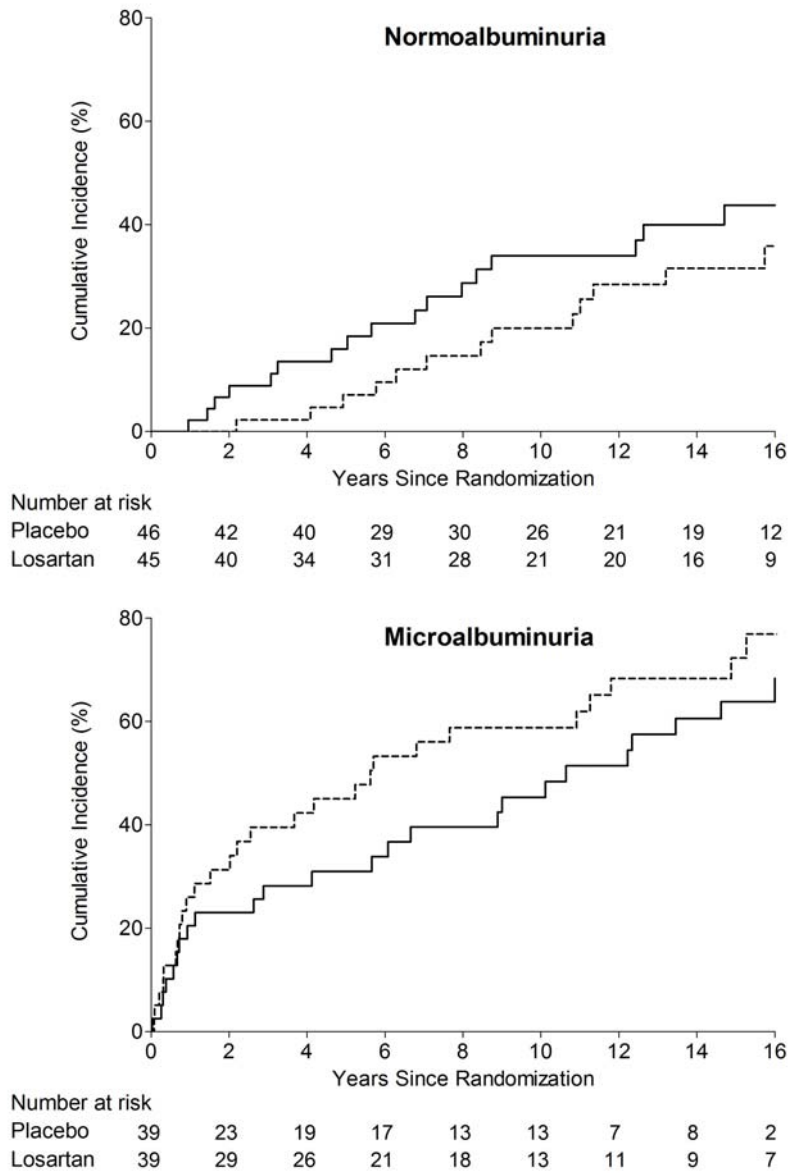

Supplement: DC160795SupplementaryData.pdf [file DC160795SupplementaryData.pdf]
